# Supplementary material
Source: PubMed Central journal article supplement (PMC8195146)
Supplement: supplementary_materials_bbab206.pdf [file supplementary_materials_bbab206.pdf]

## Supplementary Information

### Contents

|                                                                                                                                                                                         |    |
|-----------------------------------------------------------------------------------------------------------------------------------------------------------------------------------------|----|
| Supplemental Methods .....                                                                                                                                                              | 2  |
| Supplemental Table 1. Demographics of patients with missing laboratory test data more than 80% in the discovery dataset. ....                                                           | 8  |
| Supplemental Table 2. Demographics, clinical laboratory tests, and mortality outcome in the first validation dataset from Huangshi City.....                                            | 9  |
| Supplemental Table 3. Demographics, baseline clinical laboratory tests, and mortality outcome in the second validation dataset from Wuhan Huoshenshan Hospital. ....                    | 10 |
| Supplemental Table 4. Comparisons between raw data from medical records and the imputed data of laboratory tests in the discovery dataset. ....                                         | 11 |
| Supplemental Table 5. Comparisons between raw data from medical records and the imputed data of laboratory tests in the first validation dataset from Huangshi City. ....               | 13 |
| Supplemental Table 6. Comparisons between raw data from medical records and the imputed data of laboratory tests in the second validation dataset from Wuhan Huoshenshan Hospital. .... | 14 |
| Supplemental Figure 1. Distributions of all laboratory biomarker values in the discovery dataset.....                                                                                   | 15 |
| Supplemental Figure 2. Clinical biomarkers that are ranked according to the importance in HTREE model including all laboratory biomarkers in the discovery phase. ....                  | 16 |
| Supplemental Figure 3. The predicted longitudinal measurements of Patient A (survived) and patient B (deceased) in the discovery dataset.....                                           | 17 |
| Supplemental Figure 4. Fitting trajectory patterns of biomarkers for patients who survived or deceased in the first validation dataset from Huangshi City. ....                         | 18 |
| Supplemental Figure 5. Time-varying effects of biomarkers in the first validation dataset from Huangshi City.....                                                                       | 19 |
| Supplemental Figure 6. Fitting trajectory patterns of biomarkers for patients who survived or deceased in the second validation dataset from Wuhan Huoshenshan Hospital. ....           | 20 |
| Supplemental Figure 7. Time-varying effects of biomarkers in the second validation dataset from Wuhan Huoshenshan Hospital.....                                                         | 21 |
| References .....                                                                                                                                                                        | 22 |

## Supplemental Methods

### Historical regression trees

The historical regression trees (HTREE) method is an extension of the standard tree method fitting a random forest model to longitudinal data and producing a non-parametric estimate of how the response depends on all of its prior realizations as well as that of any time-varying predictor variables [1]. Data is assumed to be in the longitudinal data form:

$z_{ij} = (y_{ij}, t_{ij}, x_{ij})$  for  $i = 1, 2, \dots, n$  and  $j = 1, 2, \dots, n_i$ , with  $y_{ij}$  being the response for the  $i$ -th subject at the  $j$ -th observation time  $t_{ij}$ . The tree node split of a historic regression tree is based on the concurrent and historical predictors for the response  $y_{ij}$ . The concurrent predictor  $(t_{ij}, x_{ij})$  is a predictor value observed at the same time as the response  $y_{ij}$ . An historic predictor is one of all predictor values observed prior to the time  $t_{ij}$  of a given time point element  $(y_{ij}, t_{ij}, x_{ij})$  for subject  $i$  at time  $t_{ij}$ .

The node split of HTREE on a concurrent predictor follows the approach of standard classification trees. For historical predictors, the splitting is modified since, associated with each observed response  $y_{ij}$ . For these, the splitting is done by first transforming the preceding values of a predictor using a summary function, the *hrf* function in the R package “htree” [2]. The importance of a variable can be measured by comparing model prediction errors with and without the input variable under investigation in the HTREE model. The variable importance summary statistics of predictors is based on increase in the mean squared error (MSE) when the predictor  $i$  is replaced with permuted values in the algorithm. Specially, consider the out of bag sample corresponding to the  $b^{th}$  bootstrap sample, recalling that these  $l = 1, \dots, n_b$  out of bag subjects were those not used to build the  $b^{th}$  decision tree. For out of bag subject 1, data from measurement time  $s_{lj}$  is  $\{S_1^r(s_{lj}), Z_l, Y_l(s_{lj})\}, l = 1, \dots, n_b, j = 1, \dots, m_l$ , and

the estimated  $\tau$ -year survival probability for individual  $l$  at time  $s_{lj}$  based upon traversing the  $b^{th}$  decision tree and landing in partition  $R_{bkl}$  is  $\overline{S_l^\tau(s_{lj})}_{R_{bkl}}$ . For the  $b^{th}$  decision tree, model fit in the out of bag sample is characterized by

$$MSE_b(Z) = \sum_{l=1}^{n_b} 1/ml \sum_{j=1}^{m_l} (S_l^\tau(s_{lj}) - \overline{S_l^\tau(s_{lj})}_{R_{bkl}})^2,$$

where the summand is the average mean squared error for individual  $l$  across follow-up windows,  $j = 1, \dots, m_l$ . Denote  $MSE_b(Z)$  the value of  $MSE_b$  when the input variable of interest has been randomly permuted as described above, altering the estimated  $\tau$ -year survival probabilities for individual  $l$  at each time  $s_{lj}$  in the formula. The importance of the input variable under consideration is calculated as

$$\frac{\sum_{b=1}^B [MSE_b(Z) - MSE_b(Z)]}{\sum_{b=1}^B MSE_b(Z)},$$

measuring the relative increase in  $MSE_b(Z)$  due to

permuting the input variable under consideration. The “htree” package reports the marginalized error based on this calculation, with larger values indicating greater predictor importance for assessing the impact of an input variable.

### Joint model

The joint model is a dynamic prediction model often used to typify relationships between the longitudinal process and time-to-event outcome. The joint model consists of two linked sub-models: a survival sub-model and a longitudinal (mixed effect) model [3].

We let  $T_i$  denote the observed failure time for the  $i^{th}$  ( $i = 1, 2, \dots, n$ ) subject, which is taken as the minimum of the true event time  $T_i^*$  and the censoring time  $C_i$ , that is,  $T_i = \min(T_i^*, C_i)$ . Further, we define the event indicator as  $\delta_i = I(T_i^* \leq C_i)$ , where  $I(\cdot)$  is the indicator function that takes the value 1 if condition  $T_i^* \leq C_i$  is satisfied, and 0 otherwise. For longitudinal responses, let  $y_i(t)$  denote the value of the

longitudinal biomarkers at time point  $t$  for the  $i^{\text{th}}$  subject. The actual observed longitudinal biomarkers for subject  $i$  consist of the measurements  $y_{ij} = \{y_i(t_{ij}), j = 1, \dots, n_i\}$  taken at time points  $t_{ij}$ . We will denote the true and unobserved value of the longitudinal outcome at time  $t$  as  $m_i(t)$ . Here, a linear mixed effects model was used to describe the subject-specific longitudinal evolutions:

$$y_i(t) = m_i(t) + \varepsilon_i(t) = x_i^T(t)\beta + z_i^T(t)b_i + \varepsilon_i(t) \quad , \quad \varepsilon_i(t) \sim N(0, \sigma^2)$$

where  $\beta$  denotes the vector of the unknown fixed-effects parameters,  $b_i$  the vector of random effects,  $x_i(t)$  and  $z_i(t)$  the row vectors of the design matrices for the fixed and random effects, respectively, and  $\varepsilon_i(t)$  is the measurement error term with variance  $\sigma^2$ . Finally, the random effects  $b_i$  are assumed normally distributed with mean zero and covariance matrix  $D$  and independent of  $\varepsilon_i(t)$ . To quantify the effect of  $m_i(t)$  on the risk for an event, a standard option is to use a relative risk model of the form:

$$h_1(t | M_i(t), \omega_i) = \lim_{dt \rightarrow 0} \Pr(t \leq T_i^* t + dt | T_i^*, M_i(t), \omega_i) / dt = h_0(t) \exp\{\gamma^T \omega_i + \partial m_i(t)\}$$

where  $M_i(t) = \{m_i(u); 0 \leq u < t\}$  denotes the history of the true unobserved longitudinal process up to time point  $t$ ,  $h_0(\cdot)$  denotes the baseline risk function, and  $\omega_i$  is a vector of baseline covariates with a corresponding vector of regression coefficients  $\gamma$ .

Bayesian inference was applied for parameter estimation using Markov chain Monte Carlo (MCMC) algorithms, and this can be applied to a limited class of models with the R package JMbayes [4]. Expression for the posterior distribution of model parameters is derived under the assumptions that, given the random effects, the longitudinal and event time processes are assumed independent, and the longitudinal responses of each subject are assumed independent.

### *Dynamic prediction*

Under the Bayesian specification of the joint model, we can derive subject-specific predictions for either the survival outcome. Based on a joint model fitted to the sample  $D_n = \{T_i, \delta_i, y_i; i = 1, \dots, n\}$  from the target population, we are interested in dynamic predictions for a new subject  $j$  from the same population given the longitudinal biomarkers history:  $Y_i(t) = \{y_{il}(t_{il}); 0 \leq t_{il} \leq t, l = 1, \dots, n_j\}$ , and has a vector of baseline covariates  $w_i$ . We supposed that the biomarker measurements have been recorded up to  $t$ , implying that subject  $i$  was event-free up to this time point. Therefore, it is more relevant to focus on conditional subject-specific predictions, given survival up to  $t$ . In particular, for any time  $u > t$  we are interested in the probability that subject  $j$  will survive at least up to time  $u$ ,

$$\begin{aligned} \pi_i(u|t) &= P(T_i^* \geq u | T_i^* > t, y_i(t), \omega_i, D_n) = \int P(T_i^* \geq u | T_i^* > t, y_i(\theta)) p(\theta | D_n) d\theta \\ P(T_i^* \geq u | T_i^* > t, y_i(t), \theta) &= \int P(T_i^* \geq u | T_i^* > t, b_i, \theta) p(b_i | T_i^* > t, y_i(t), \theta) db_i \\ &= \int \frac{S_i\{u | H_i(u, b_i), \theta\}}{S_i\{t | H_i(u, b_i), \theta\}} p(b_i | T_i^* > t, y_i(t), \theta) db_i \end{aligned}$$

The posterior distribution of the parameters for the original data  $D_n$  was used to obtain  $\pi_i(u|t)$  within Monte Carlo samples by a Monte Carlo algorithm. This dynamic prediction usually is applied to predict the dynamic survival probability of subject  $j$  when new biomarker information is recorded at time  $t > u$ .

### *Discrimination*

To measure the discriminative capability of longitudinal markers, we focused on how well the model discriminates between patients with or without the event. We used the time-dependent area under the receiver operating characteristic curve (AUC) for the occurrence of the event in a time interval. We assumed that there were longitudinal measurements:  $Y_j(t) = \{y_j(t_{jl}); 0 \leq t_{jl} \leq t, l = 1, \dots, n_j\}$

up to the time point  $t$  for subject  $j$ . This subject  $j$  may either experience the event, that is  $\pi_j(t + \Delta t | t) \leq c$  within a clinically relevant time interval  $\Delta t$  or not  $\pi_j(t + \Delta t | t) > c$ ,

where  $0 \leq c \leq 1$ . Thus, in this context, we define sensitivity and specificity as  $P\{\pi_j(t+\Delta t) \leq c | T_j^* \in (t, t+\Delta t)\}$  and  $P\{\pi_j(t+\Delta t) > c | T_j^* > t+\Delta t\}$ , respectively. For a randomly chosen pair of subjects  $\{i, j\}$ , in which both subjects have provided measurements up to time  $t$ . Then, the discriminative capability of the assumed model can be assessed by the time-dependent AUC, which is calculated for varying values of  $c$  and is given by:

$$AUC(t, \Delta t) = P[\pi_i(t+\Delta t) < \pi_j(t+\Delta t) | \{T_i^* \in (t, t+\Delta t)\} \cap \{T_j^* > t+\Delta t\}]$$

That is, if subject  $i$  experiences the event within the relevant time frame but subject  $j$  does not, we would expect the assumed model to assign higher probability of surviving longer than  $t+\Delta t$  to the subject who did not experience the event.

#### *Time-varying effects*

A time-varying joint model has been postulated to measure the relationship between survival and longitudinal biomarkers over time [5]. Specially, we have

$h_i(t | M_i(t), \omega_i) = h_0(t) \exp[\gamma^T \omega_i + f\{\lambda(t), M_i(t)\}]$  where the function  $f\{\lambda(t), M_i(t)\}$  postulates that the hazard of the event associates with the value and the slope of the longitudinal biomarkers at  $t$  or the accumulated longitudinal process up to time  $t$ . A p-splines approach based on using a high or relatively high number of equally spaced

knots was adopted for  $\lambda(t)$ . In particular, we take  $\lambda(t) = \sum_{l=1}^L \alpha_l B_l(t)$ , where  $\alpha$  is a set of

parameters that captures strength of the association between longitudinal biomarkers and survival outcome, and  $B_l(t)$  denotes the  $l$ -th basis function of a B-spline [6]. The

smoothness of functions  $\lambda(t)$  is controlled by the following priors for the coefficient

that links longitudinal and survival outcomes  $\alpha$  :  $\alpha | \tau_\alpha \sim N_L(0, \tau_\alpha M_\alpha)$  and  $\tau_\alpha \sim \text{Gamma}(c_1, c_2)$ , where  $M_\alpha$  are the penalty matrices. In particular,

$M_\alpha = \Delta_r^T \Delta_r + 10^{-6} I$  and  $\Delta_r$  is a  $r$ th order difference matrix. The scaled identity matrix  $I$  ensures a positive defined variance-covariance matrix.



**Supplemental Table 1. Demographics of patients with missing laboratory test data more than 80% in the discovery dataset.**

| <b>ID</b> | <b>Age</b> | <b>Gender</b> | <b>Outcome</b> |
|-----------|------------|---------------|----------------|
| 187       | 44         | Male          | Survival       |
| 189       | 61         | Male          | Survival       |
| 192       | 34         | Male          | Survival       |
| 197       | 67         | Male          | Survival       |
| 200       | 25         | Male          | Survival       |
| 201       | 39         | Male          | Survival       |
| 253       | 51         | Male          | Dead           |
| 265       | 81         | Female        | Dead           |
| 268       | 69         | Male          | Dead           |
| 271       | 54         | Male          | Dead           |
| 275       | 65         | Male          | Dead           |
| 285       | 63         | Male          | Dead           |
| 289       | 63         | Male          | Dead           |
| 311       | 77         | Female        | Dead           |
| 347       | 80         | Female        | Dead           |
| 354       | 57         | Male          | Dead           |
| 359       | 65         | Male          | Dead           |



**Supplemental Table 2. Demographics, clinical laboratory tests, and mortality outcome in the first validation dataset from Huangshi City.**

|                                | <b>Total<br/>(n = 112)</b> | <b>Survived<br/>(n = 81)</b> | <b>Dead<br/>(n = 31)</b> | <b>P-value</b>       |
|--------------------------------|----------------------------|------------------------------|--------------------------|----------------------|
| Age                            | 60.99±14.87                | 57.14±13.77                  | 71.03±12.96              | <0.0001 <sup>a</sup> |
| Gender, n (%)                  |                            |                              |                          | <0.0001 <sup>c</sup> |
| Male                           | 73(65.18)                  | 54(73.97)                    | 19(26.03)                |                      |
| Female                         | 39(34.82)                  | 27(69.23)                    | 12(30.77)                |                      |
| Median follow-up (days)        | 11                         | 15                           | 7                        | <0.0001 <sup>b</sup> |
| Laboratory tests<br>(baseline) |                            |                              |                          |                      |
| LDH, U/L                       | 385.02 ± 189.09            | 349.12 ± 167.76              | 496.94 ± 212.46          | 0.0005 <sup>b</sup>  |
| WBC, 10 <sup>9</sup> /L        | 7.26 ± 5.18                | 6.18 ± 3.55                  | 10.08 ± 7.4              | 0.0050 <sup>b</sup>  |
| NEU, 10 <sup>9</sup> /L        | 5.7 ± 4.13                 | 4.94 ± 3.32                  | 7.86 ± 5.36              | 0.0086 <sup>b</sup>  |
| Hs-CRP, mg/L                   | 17.34 ± 43.65              | 19.8 ± 51.71                 | 11.42 ± 14.36            | 0.6142 <sup>a</sup>  |
| MPV, fL                        | 11.19 ± 1.03               | 11.09 ± 1.08                 | 11.45 ± 0.83             | 0.1069 <sup>a</sup>  |
| Lymphocyte (%)                 | 14.28 ± 8.49               | 15.9 ± 8.47                  | 9.6 ± 6.74               | 0.0006 <sup>a</sup>  |
| Monocytes (%)                  | 7.57 ± 4.6                 | 8.2 ± 4.78                   | 5.85 ± 3.63              | 0.0162 <sup>a</sup>  |
| Creatinine, umol/L             | 71.6 ± 34.79               | 70.48 ± 37.15                | 74.83 ± 27.27            | 0.5614 <sup>a</sup>  |
| PT, S                          | 12.14 ± 1.4                | 12.04 ± 1.42                 | 12.46 ± 1.31             | 0.2354 <sup>a</sup>  |
| RDW, %                         | 13.27 ± 1.95               | 13.33 ± 2.22                 | 13.10 ± 0.78             | 0.3969 <sup>b</sup>  |
| Urea, nmol/L                   | 5.75 ± 3.26                | 5 ± 2.83                     | 7.8 ± 3.54               | 0.0014 <sup>a</sup>  |
| Glucose, mmol/L                | 7.98 ± 5.04                | 7.88 ± 5.66                  | 8.25 ± 2.97              | 0.1121 <sup>b</sup>  |
| AST, U/L                       | 45.37 ± 27.52              | 39.94 ± 23.03                | 61.43 ± 33.54            | 0.0013 <sup>b</sup>  |

Note: LDH: lactate dehydrogenase; WBC: white blood cell counts; NEU: neutrophil; Hs-CRP: hypersensitive c-reactive protein; MPV: mean platelet volume; PT: prothrombin time; RDW: red blood cell distribution width; AST: aspartate aminotransferase;

Continuous variables were presented as mean ± standard deviation; categorical variables were presented as frequency and proportion [n (%)].

<sup>a</sup>P-value was derived from Student's *t*-test.

<sup>b</sup>P-value was derived from rank-sum test.

<sup>c</sup>P-value was derived from  $\chi^2$  test.

**Supplemental Table 3. Demographics, baseline clinical laboratory tests, and mortality outcome in the second validation dataset from Wuhan Huoshenshan Hospital.**

|                                | <b>Total<br/>(n = 1527)</b> | <b>Survival<br/>(n = 1470)</b> | <b>Dead<br/>(n = 57)</b> | <b>P-Value</b>        |
|--------------------------------|-----------------------------|--------------------------------|--------------------------|-----------------------|
| Age                            | 61.81 ± 14.13               | 61.44 ± 14.1                   | 71.39 ± 11.26            | < 0.0001 <sup>a</sup> |
| Gender                         |                             |                                |                          | 0.0098 <sup>c</sup>   |
| Male                           | 775 (50.75)                 | 736(50.07)                     | 39(68.42)                |                       |
| Female                         | 752 (49.25)                 | 734(49.93)                     | 18(31.58)                |                       |
| Median Follow-up (days)        | 15                          | 15                             | 14                       | 0.8084 <sup>b</sup>   |
| Laboratory tests<br>(baseline) |                             |                                |                          |                       |
| LDH, U/L                       | 213.32 ± 91.67              | 206.73 ± 80.13                 | 423.08 ± 163.66          | < 0.0001 <sup>b</sup> |
| WBC, 10 <sup>9</sup> /L        | 10.15 ± 37.47               | 10.14 ± 38.13                  | 10.22 ± 8.22             | < 0.0001 <sup>b</sup> |
| NEU, 10 <sup>9</sup> /L        | 4.4 ± 2.83                  | 4.22 ± 2.23                    | 9.36 ± 8.03              | < 0.0001 <sup>b</sup> |
| Hs-CRP, mg/L                   | 2.61 ± 3.07                 | 2.58 ± 3.05                    | 6.2 ± 3.79               | 0.0038 <sup>b</sup>   |
| MPV, fL                        | 10.11 ± 1.2                 | 10.09 ± 1.19                   | 10.78 ± 1.31             | 0.0001 <sup>b</sup>   |
| Lymphocyte, %                  | 24.2 ± 10.47                | 24.72 ± 10.13                  | 10.27 ± 9.79             | < 0.0001 <sup>b</sup> |
| Monocyte, %                    | 7.65 ± 2.6                  | 7.75 ± 2.52                    | 4.98 ± 3.27              | < 0.0001 <sup>b</sup> |
| Procalcitonin, ng/mL           | 0.11 ± 0.56                 | 0.11 ± 0.57                    | 0.44 ± 0.42              | < 0.0001 <sup>b</sup> |
| Creatinine, umol/L             | 73.33 ± 64.15               | 72.15 ± 62.73                  | 105.46 ± 90.31           | < 0.0001 <sup>b</sup> |
| PT, S                          | 13.13 ± 2.11                | 13.07 ± 2.04                   | 15.35 ± 3.42             | < 0.0001 <sup>b</sup> |
| RDW, %                         | 13.2 ± 1.34                 | 13.2 ± 1.32                    | 13.19 ± 1.75             | 0.3587 <sup>b</sup>   |
| Urea, nmol/L                   | 5.21 ± 2.98                 | 5.05 ± 2.68                    | 9.6 ± 6.04               | < 0.0001 <sup>b</sup> |
| Glucose, mmol/L                | 5.73 ± 2.33                 | 5.67 ± 2.29                    | 7.42 ± 2.81              | < 0.0001 <sup>b</sup> |
| AST, U/L                       | 26.07 ± 22.44               | 25.57 ± 21.68                  | 41.01 ± 36.33            | 0.0001 <sup>b</sup>   |

Note: LDH: lactate dehydrogenase; WBC: white blood cell counts; NEU: neutrophil; Hs-CRP: hypersensitive c-reactive protein; MPV: mean platelet volume; PT: prothrombin time; RDW: red blood cell distribution width; AST: aspartate aminotransferase;

Continuous variables were presented as mean ± standard deviations; categorical variables were presented as frequency and proportion [n (%)].

<sup>a</sup>P-value was derived from Student's *t*-test.

<sup>b</sup>P-value was derived from rank-sum test.

<sup>c</sup>P-value was derived from  $\chi^2$  test.

**Supplemental Table 4. Comparisons between raw data from medical records and the imputed data of laboratory tests in the discovery dataset.**

| <b>Laboratory test</b>                      | <b>Mean (SD)<sup>a</sup></b> | <b>Mean (SD)<sup>b</sup></b> | <b>P-value</b> |
|---------------------------------------------|------------------------------|------------------------------|----------------|
| Procalcitonin*, ng/ml                       | 1.13 (4.7)                   | 1.59 (5.63)                  | 0.1034         |
| Basophil, %                                 | 0.21 (0.22)                  | 0.23 (0.23)                  | 0.1651         |
| Prothrombin time*, S                        | 16.51 (8.76)                 | 16.04 (7.24)                 | 0.2547         |
| Platelet large cell ratio                   | 31.72 (8.57)                 | 32.14 (8.58)                 | 0.2826         |
| Basophil, 10 <sup>9</sup> /L                | 0.02 (0.02)                  | 0.02 (0.02)                  | 0.2846         |
| D-D dimer, mg/L                             | 7.83 (9.18)                  | 7.33 (8.97)                  | 0.2915         |
| Thrombocytocrit                             | 0.21 (0.09)                  | 0.21 (0.09)                  | 0.3143         |
| Mean platelet volume*, fL                   | 10.9 (1.09)                  | 10.95 (1.09)                 | 0.3403         |
| Monocytes*, %                               | 6.16 (3.84)                  | 6.32 (4.25)                  | 0.3818         |
| Glucose*, mmol/L                            | 8.84 (5.17)                  | 9.03 (5.42)                  | 0.4524         |
| Red blood cell distribution width*, %       | 13.06 (1.72)                 | 13.11 (1.76)                 | 0.5364         |
| PLT distribution width                      | 12.99 (2.79)                 | 13.07 (2.83)                 | 0.5824         |
| White blood cell count*, 10 <sup>9</sup> /L | 10.95 (20.06)                | 11.44 (20.56)                | 0.5997         |
| Uric acid, umol/L                           | 275.93 (151.35)              | 272.5 (147.51)               | 0.6151         |
| Red blood cell count                        | 6.28 (14.88)                 | 6.6 (15.67)                  | 0.6454         |
| Urea*, mmol/L                               | 9.43 (9.3)                   | 9.24 (9)                     | 0.6482         |
| EGFR                                        | 81.91 (32.02)                | 82.53 (31.82)                | 0.6711         |
| Eosinophils, %                              | 0.64 (1.07)                  | 0.66 (1.09)                  | 0.6779         |
| Eosinophil, 10 <sup>9</sup> /L              | 0.04 (0.06)                  | 0.04 (0.06)                  | 0.715          |
| Total protein, g/L                          | 65.38 (7.57)                 | 65.26 (7.5)                  | 0.7155         |
| Hemoglobin, g/L                             | 124.35 (19.38)               | 124.6 (19.44)                | 0.7822         |
| RBC distribution width SD                   | 42.35 (6.26)                 | 42.43 (6.33)                 | 0.7912         |
| HCO <sub>3</sub> <sup>-</sup> , mmol/L      | 23.2 (4.32)                  | 23.25 (4.39)                 | 0.7946         |
| Creatinine*, umol/L                         | 108.83 (133)                 | 107.44 (128.46)              | 0.8162         |
| Serum sodium                                | 141.45 (7.09)                | 141.37 (6.95)                | 0.8187         |
| International standard ratio                | 1.31 (0.82)                  | 1.3 (0.85)                   | 0.8235         |
| Neutrophils, %                              | 77.53 (16.46)                | 77.37 (16.18)                | 0.8285         |
| Corrected calcium                           | 2.35 (0.13)                  | 2.35 (0.13)                  | 0.8307         |
| Hypersensitive C reactive protein*, mg/L    | 76.2 (81.16)                 | 77.05 (82.75)                | 0.8329         |
| Hematocrit                                  | 36.6 (5.26)                  | 36.65 (5.31)                 | 0.8353         |
| Albumin, g/L                                | 32.1 (6.2)                   | 32.04 (6.15)                 | 0.8453         |
| Monocytes                                   | 0.49 (1.22)                  | 0.5 (1.18)                   | 0.8500         |
| Indirect bilirubin, umol/L                  | 6.89 (7.05)                  | 6.83 (6.86)                  | 0.8503         |
| Lactate dehydrogenase*, U/L                 | 470.17 (365.02)              | 473.11 (365.64)              | 0.8599         |
| Prothrombin activity                        | 78.9 (22.19)                 | 78.68 (28.05)                | 0.8609         |
| Platelet count                              | 185.76 (103.87)              | 184.99 (103.8)               | 0.8694         |

| <b>Laboratory test</b>                    | <b>Mean (SD)<sup>a</sup></b> | <b>Mean (SD)<sup>b</sup></b> | <b><i>P</i>-value</b> |
|-------------------------------------------|------------------------------|------------------------------|-----------------------|
| Serum potassium                           | 4.5 (0.81)                   | 4.49 (0.8)                   | 0.8887                |
| Glutamic pyruvic transaminase             | 37.2 (67.71)                 | 36.8 (64.86)                 | 0.8938                |
| Mean corpuscular hemoglobin concentration | 342.74 (17.34)               | 342.64 (17.2)                | 0.8992                |
| Aspartate aminotransferase*, U/L          | 45.69 (100.36)               | 45.17 (96.4)                 | 0.9081                |
| Calcium, mmol/L                           | 2.08 (0.16)                  | 2.08 (0.16)                  | 0.91                  |
| Total cholesterol, mmol/L                 | 3.69 (0.98)                  | 3.7 (0.99)                   | 0.9332                |
| Mean corpuscular hemoglobin               | 30.97 (2.85)                 | 30.96 (2.85)                 | 0.9341                |
| $\gamma$ glutamyl transpeptidase, U/L     | 54.93 (69.32)                | 54.68 (69.08)                | 0.9367                |
| Alkaline phosphatase, U/L                 | 82.2 (46.55)                 | 82.05 (45.87)                | 0.941                 |
| Neutrophils*, $10^9/L$                    | 7.77 (6.06)                  | 7.79 (6.11)                  | 0.9442                |
| Direct bilirubin, $\mu\text{mol/L}$       | 9.77 (21.42)                 | 9.71 (20.84)                 | 0.9473                |
| Lymphocyte*, %                            | 15.46 (12.89)                | 15.43 (12.83)                | 0.9547                |
| Globulin, g/L                             | 33.25 (5.51)                 | 33.24 (5.52)                 | 0.9596                |
| Serum chloride                            | 103.03 (7.46)                | 103.02 (7.33)                | 0.9618                |
| Total bilirubin, g/L                      | 16.58 (26.63)                | 16.55 (25.82)                | 0.9779                |
| Lymphocyte, $10^9/L$                      | 0.98 (1.49)                  | 0.98 (1.46)                  | 0.9923                |
| Mean corpuscular volume                   | 90.32 (6.47)                 | 90.32 (6.56)                 | 0.9979                |

Note: \* prognosis biomarkers in the selected set using historical regression trees;

<sup>a</sup> mean (standard deviation) of raw data; <sup>b</sup> mean (standard deviation) of imputed data;

SD: standard deviations; *P*-value was derived from Student's *t*-test.

**Supplemental Table 5. Comparisons between raw data from medical records and the imputed data of laboratory tests in the first validation dataset from Huangshi City.**

| <b>Laboratory test</b>                     | <b>Mean (SD)<sup>a</sup></b> | <b>Mean (SD)<sup>b</sup></b> | <b><i>P</i>-value</b> |
|--------------------------------------------|------------------------------|------------------------------|-----------------------|
| Prothrombin time, S                        | 13.85 (5.35)                 | 13.43 (4.95)                 | 0.1535                |
| White blood cell count, 10 <sup>9</sup> /L | 8.49 (4.96)                  | 8.12 (4.81)                  | 0.1595                |
| Lactate dehydrogenase, U/L                 | 402.61 (297.8)               | 382.46 (274.71)              | 0.2446                |
| Glucose, mmol/L                            | 8.28 (4.22)                  | 8.07 (4.12)                  | 0.3577                |
| Red blood cell distribution width, %       | 13.84 (1.86)                 | 13.77 (1.74)                 | 0.4811                |
| Urea, nmol/L                               | 8.92 (12.57)                 | 8.57 (11.2)                  | 0.5879                |
| Hypersensitive C reactive protein, mg/L    | 12.57 (28.24)                | 11.86 (28.85)                | 0.7571                |
| Creatinine, umol/L                         | 69.78 (67.31)                | 70.8 (61.34)                 | 0.7723                |
| Monocytes, %                               | 7.26 (4.59)                  | 7.32 (4.58)                  | 0.7978                |
| Lymphocyte, %                              | 13.28 (10.04)                | 13.39 (9.98)                 | 0.8327                |
| Aspartate aminotransferase, U/L            | 50.36 (99)                   | 49.57 (89.68)                | 0.8781                |
| Mean platelet volume, fL                   | 11.1 (3.74)                  | 11.12 (3.14)                 | 0.9177                |
| Neutrophils, 10 <sup>9</sup> /L            | 6.95 (4.8)                   | 6.97 (4.71)                  | 0.9270                |

Note: <sup>a</sup> mean (standard deviation) of raw data; <sup>b</sup> mean (standard deviation) of imputed data; SD: standard deviations; *P*-value was derived from Student's *t*-test.

**Supplemental Table 6. Comparisons between raw data from medical records and the imputed data of laboratory tests in the second validation dataset from Wuhan Huoshenshan Hospital.**

| <b>Laboratory test</b>                     | <b>Mean (SD)<sup>a</sup></b> | <b>Mean (SD)<sup>b</sup></b> | <b><i>P</i>-value</b> |
|--------------------------------------------|------------------------------|------------------------------|-----------------------|
| Lactate dehydrogenase, U/L                 | 218.54 (104.78)              | 219.25 (107.7)               | 0.6982                |
| White blood cell count, 10 <sup>9</sup> /L | 10.41 (58.09)                | 10.67 (62.28)                | 0.7839                |
| Neutrophils, 10 <sup>9</sup> /L            | 4.8 (4.24)                   | 4.8 (4.17)                   | 0.9698                |
| Hypersensitive C reactive protein, mg/L    | 2.61 (6.35)                  | 2.82 (5.39)                  | 0.0509                |
| Mean platelet volume, fL                   | 10.14 (1.21)                 | 10.13 (1.2)                  | 0.9211                |
| Lymphocyte, %                              | 24.16 (11.22)                | 24.16 (11.2)                 | 0.9925                |
| Monocyte, %                                | 7.58 (2.76)                  | 7.59 (2.78)                  | 0.7775                |
| Procalcitonin, ng/mL                       | 0.44 (2.92)                  | 0.45 (2.67)                  | 0.8323                |
| Creatinine, umol/L                         | 74.74 (60.08)                | 74.06 (58.29)                | 0.4986                |
| Prothrombin time, S                        | 13.4 (2.59)                  | 13.41 (2.87)                 | 0.8118                |
| Red blood cell distribution width, %       | 13.38 (1.39)                 | 13.37 (1.37)                 | 0.7622                |
| Urea, nmol/L                               | 5.8 (4.19)                   | 5.73 (4.03)                  | 0.3262                |
| Glucose, mmol/L                            | 6 (2.57)                     | 5.96 (2.51)                  | 0.3895                |
| Aspartate aminotransferase, U/L            | 27.74 (31.1)                 | 27.98 (31.67)                | 0.6418                |

Note: <sup>a</sup> mean (standard deviation) of raw data; <sup>b</sup> mean (standard deviation) of imputed data; SD: standard deviations; *P*-value was derived from Student's *t*-test.

**Supplemental Figure 1. Distributions of all laboratory biomarker values in the discovery dataset.**

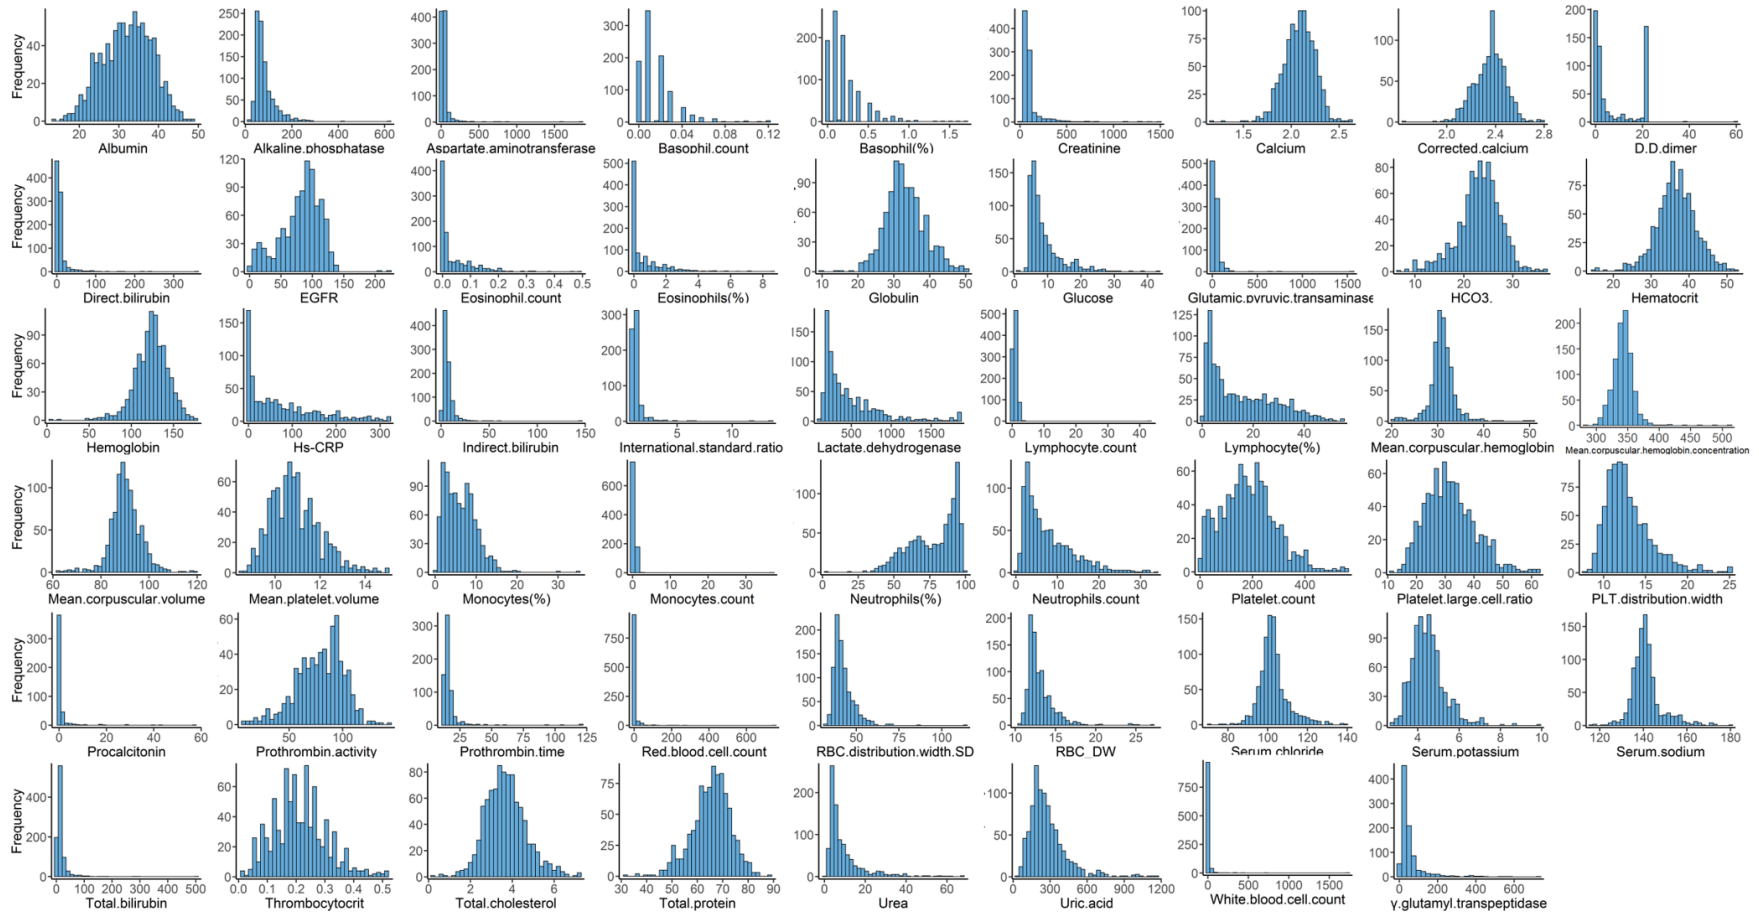

**Supplemental Figure 2. Clinical biomarkers that are ranked according to the importance in HTREE model including all laboratory biomarkers in the discovery phase. A, Importance order of laboratory biomarkers in the model based on the discovery dataset. The top 14 biomarkers (red) selected using SWSFS were used for further analysis. B, Mean importance order of all biomarkers using three-fold cross validation. LDH: lactate dehydrogenase; WBC: white blood cell counts; NEU: neutrophil; Hs-CRP: hypersensitive c-reactive protein; MPV: mean platelet volume; PT: prothrombin time; RDW: red blood cell distribution width; AST: aspartate aminotransferase.**

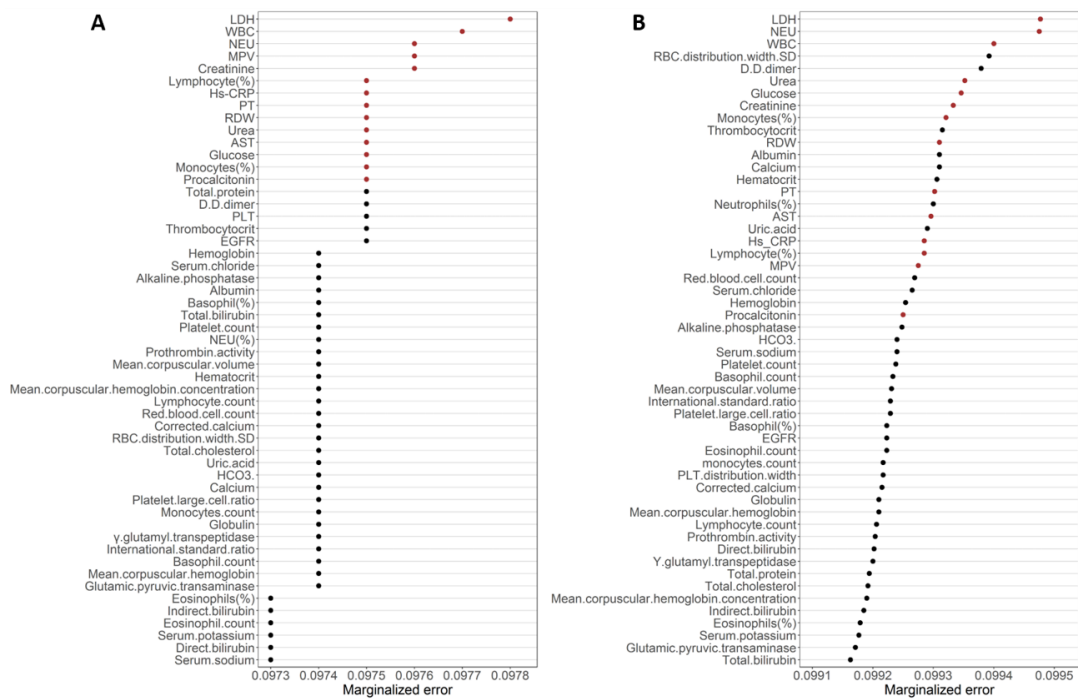



**Supplemental Figure 3. The predicted longitudinal measurements of Patient A (survived) and patient B (deceased) in the discovery dataset.** The predicted longitudinal measurements of joint model for patient A (blue) and patient B (yellow) based on the discovery dataset. Panels show the observed longitudinal biomarkers (points) and model-based predictions (lines) using natural cubic splines with two degrees of freedom. LDH: lactate dehydrogenase; WBC: white blood cell counts; NEU: neutrophil; Hs-CRP: hypersensitive c-reactive protein; MPV: mean platelet volume; PT: prothrombin time; RDW: red blood cell distribution width; AST: aspartate aminotransferase.

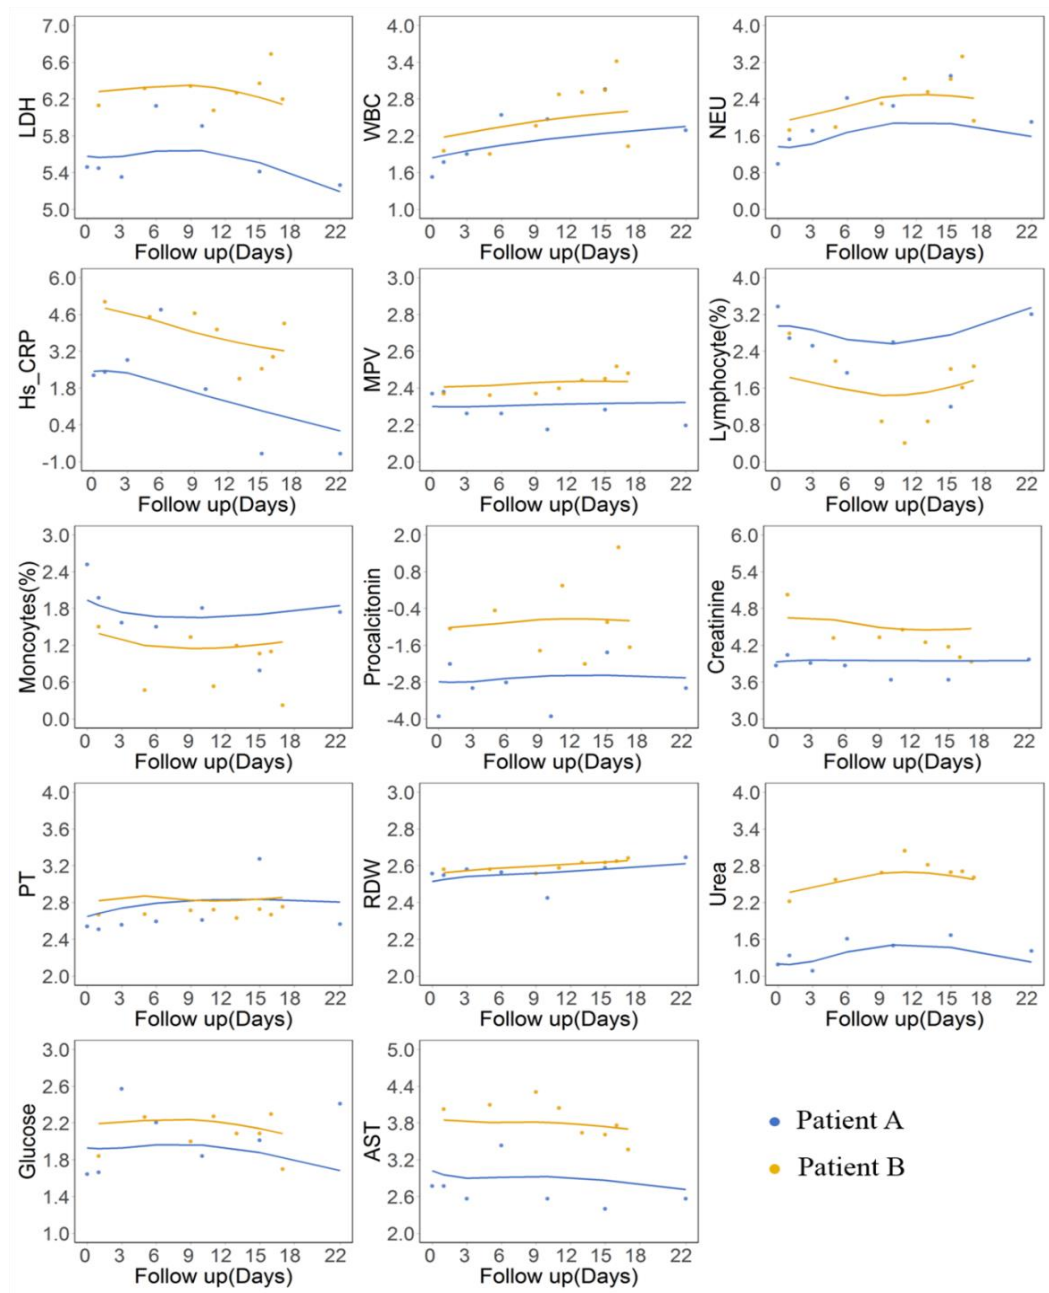

**Supplemental Figure 4. Fitting trajectory patterns of biomarkers for patients who survived or deceased in the first validation dataset from Huangshi City.** Lines represent averaged trajectories of patients who survived (blue) or deceased (red) during hospitalization using natural cubic splines with two degrees of freedom. LDH: lactate dehydrogenase; WBC: white blood cell counts; NEU: neutrophil; Hs-CRP: hypersensitive c-reactive protein; MPV: mean platelet volume; PT: prothrombin time; RDW: red blood cell distribution width; AST: aspartate aminotransferase.

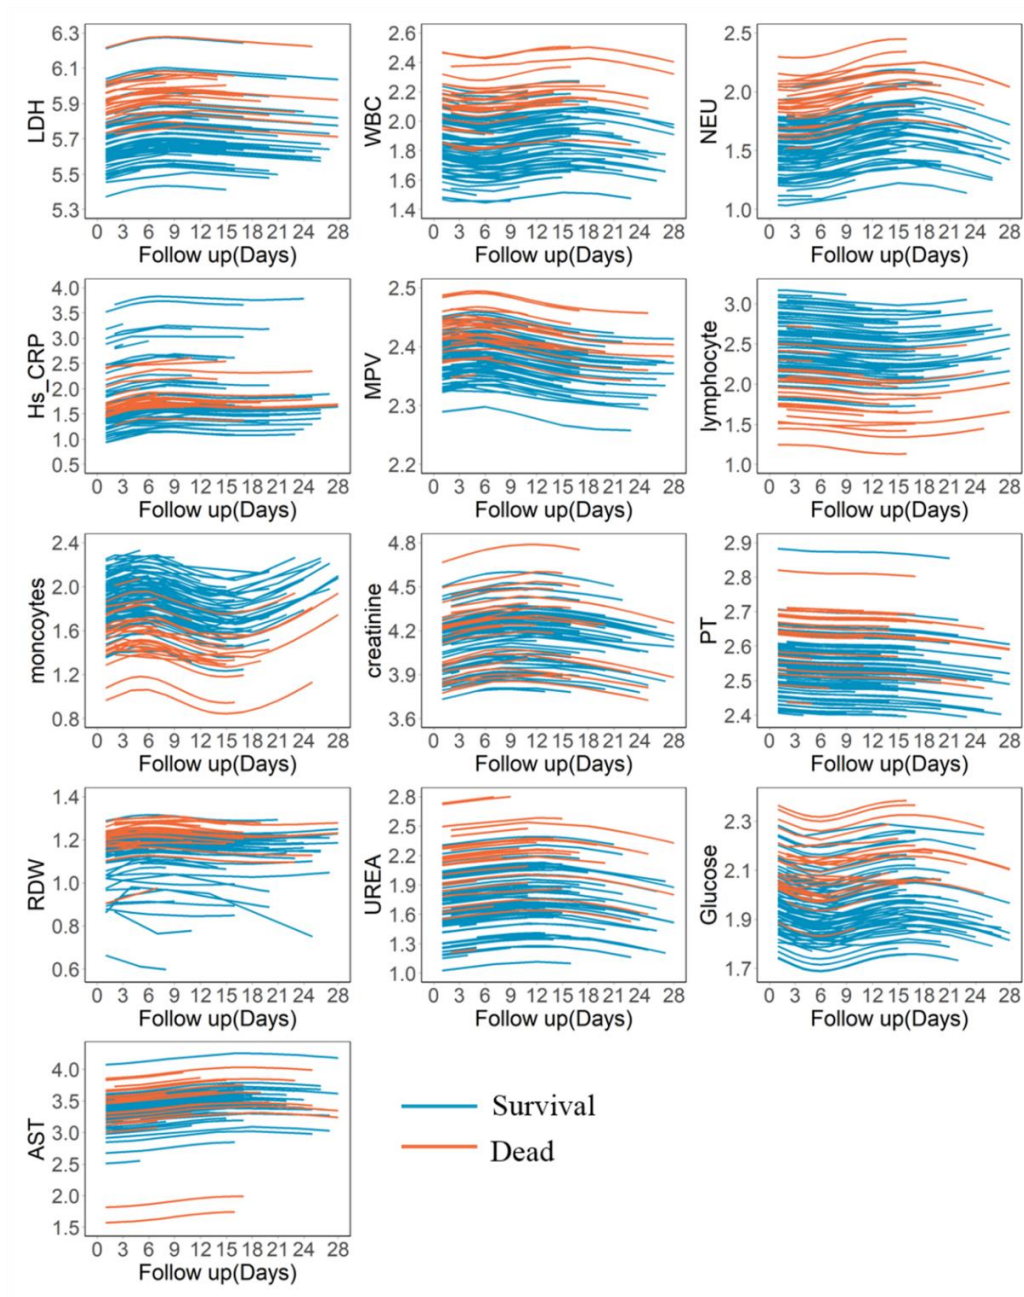

**Supplemental Figure 5. Time-varying effects of biomarkers in the first validation dataset from Huangshi City.** LDH: lactate dehydrogenase; WBC: white blood cell counts; NEU: neutrophil; Hs-CRP: hypersensitive c-reactive protein; MPV: mean platelet volume; PT: prothrombin time; RDW: red blood cell distribution width; AST: aspartate aminotransferase.

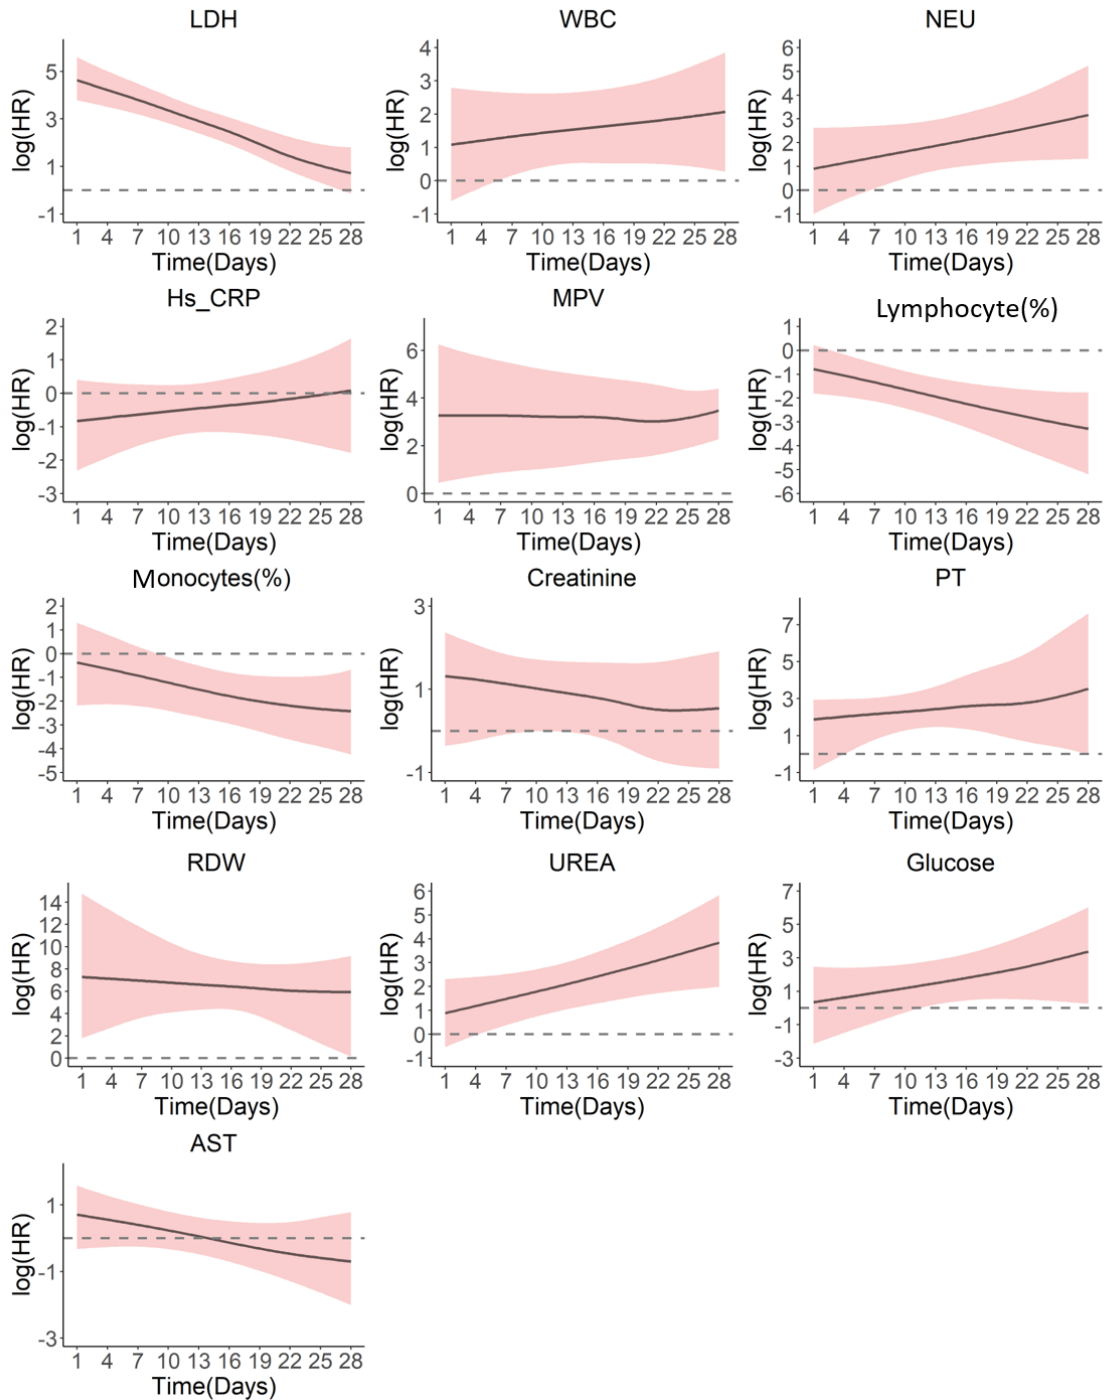

**Supplemental Figure 6. Fitting trajectory patterns of biomarkers for patients who survived or deceased in the second validation dataset from Wuhan Huoshenshan Hospital.** Lines represent averaged trajectories of patients who survived (blue) or deceased (red) during hospitalization using natural cubic splines with two degrees of freedom. LDH: lactate dehydrogenase; WBC: white blood cell counts; NEU: neutrophil; Hs-CRP: hypersensitive c-reactive protein; MPV: mean platelet volume; PT: prothrombin time; RDW: red blood cell distribution width; AST: aspartate aminotransferase.

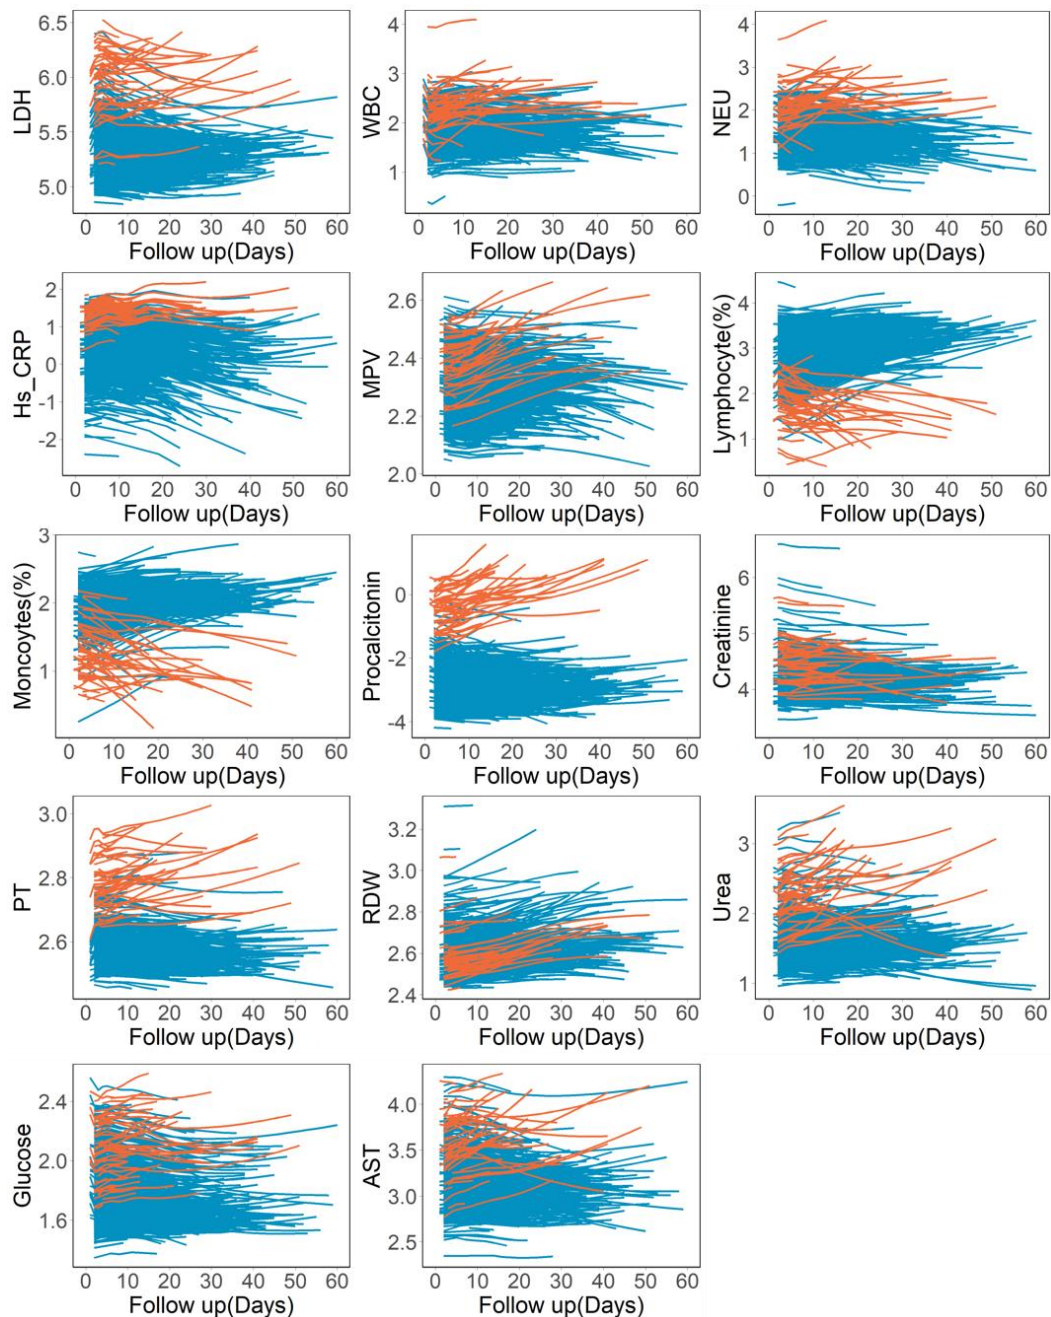



**Supplemental Figure 7. Time-varying effects of biomarkers in the second validation dataset from Wuhan Huoshenshan Hospital.** LDH: lactate dehydrogenase; WBC: white blood cell counts; NEU: neutrophil; Hs-CRP: hypersensitive c-reactive protein; MPV: mean platelet volume; PT: prothrombin time; RDW: red blood cell distribution width; AST: aspartate aminotransferase.

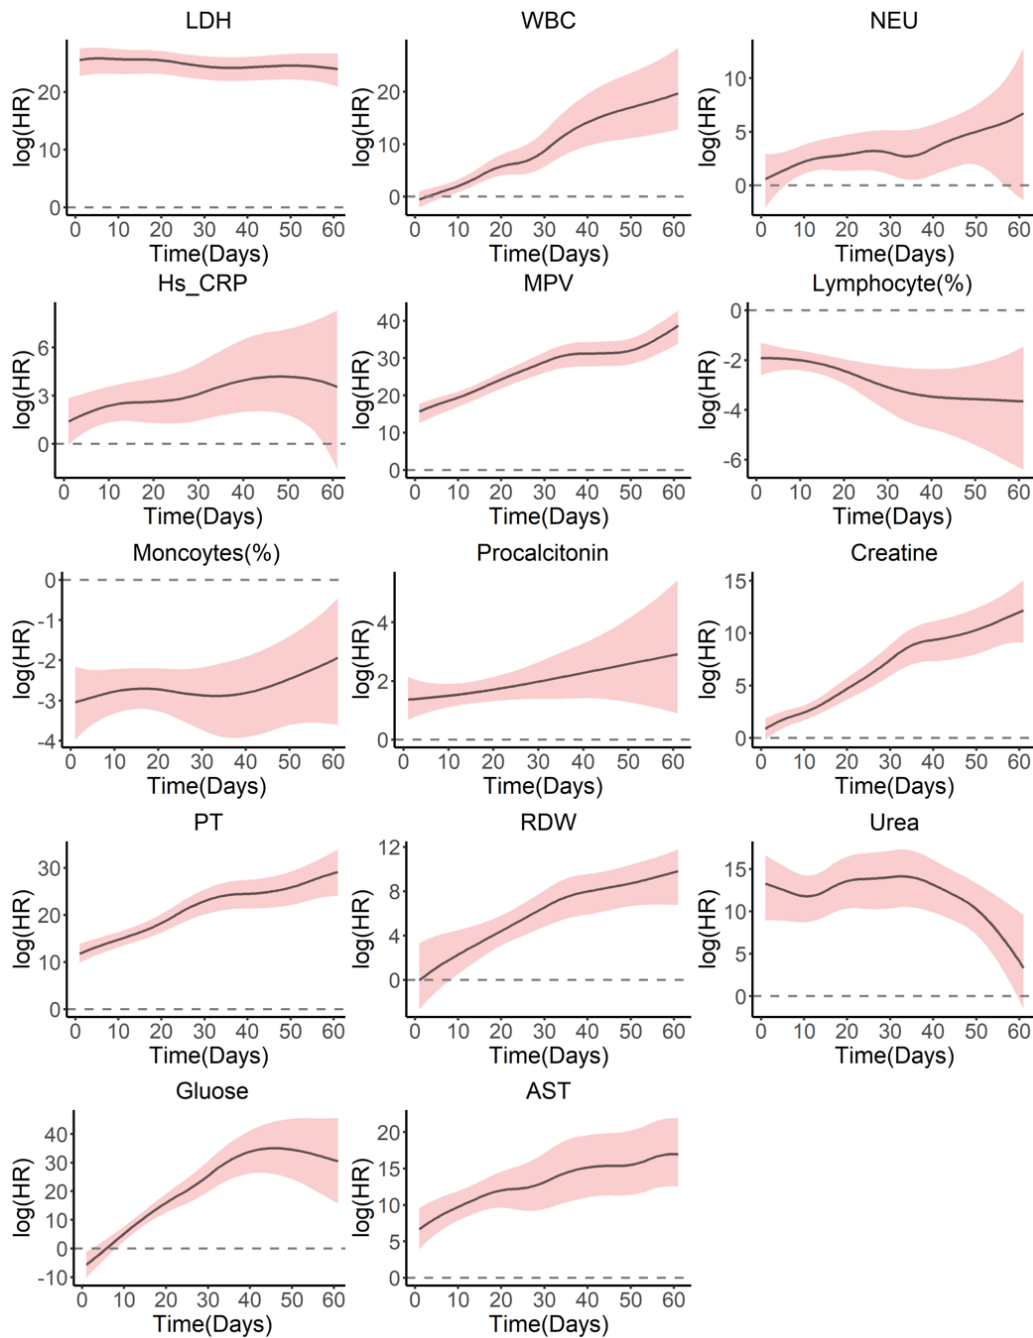

## References

1. Lili Zhao SM, Laura H. Mariani, Wenjun Ju. Dynamic Risk Prediction Using Longitudinal Biomarkers of High Dimensions, *Statistics in Medicine* 2020.
2. Sexton J. Historical Tree Ensembles for Longitudinal Data, R package 2018.
3. Rizopoulos D. Dynamic predictions and prospective accuracy in joint models for longitudinal and time-to-event data, *Biometrics* 2011;67:819-829.
4. Rizopoulos D. TheRPackageJMbayesfor Fitting Joint Models for Longitudinal and Time-to-Event Data Using MCMC, *Journal of Statistical Software* 2016;72.
5. Andrinopoulou ER, Eilers PHC, Takkenberg JJM et al. Improved dynamic predictions from joint models of longitudinal and survival data with time-varying effects using P-splines, *Biometrics* 2018;74:685-693.
6. Eilers P, Marx BJSS. Flexible smoothing with B-splines and penalties 1996;11:89-121.
